# Supplementary material for: Global Longitudinal Strain Predicts Outcomes in Patients with Reduced Left Ventricular Function Undergoing Transcatheter Edge-to-Edge Mitral Repair
Source: MDPI journal article supplement (doi:10.3390/jcm12124116), 2023-06-18

## SUPPLEMENTAL MATERIAL

**Title:** Global longitudinal strain predicts outcomes in patients with reduced left ventricular function undergoing transcatheter edge-to-edge mitral repair

Table S1

|                                                  | <b>Overall</b>   | <b>LVGLS<br/>available<br/>n=172</b> | <b>LVGLS non<br/>available<br/>n=103</b> | <b>p</b> |
|--------------------------------------------------|------------------|--------------------------------------|------------------------------------------|----------|
| <b>Age (years)</b>                               | 73.1 (67.5-79.8) | 73 (69-79)                           | 73.2 (67-79.9)                           | 0.690    |
| <b>Sex (Male %)</b>                              | 71.3             | 73.4                                 | 67.7                                     | 0.310    |
| <b>Hypertension (%)</b>                          | 73.1             | 70.5                                 | 77.5                                     | 0.211    |
| <b>Diabetes Mellitus (%)</b>                     | 48.4             | 47                                   | 51                                       | 0.510    |
| <b>Glomerular filtrate rate &lt;60 (%)</b>       | 49.1             | 47.4                                 | 51.5                                     | 0.543    |
| <b>Smoking (%)</b>                               | 60.7             | 57.8                                 | 65.7                                     | 0.194    |
| <b>Hemodialysis (%)</b>                          | 1.1              | 0.6                                  | 2                                        | 0.297    |
| <b>Atrial Fibrillation (%)</b>                   | 54               | 54.3                                 | 54                                       | 0.947    |
| <b>Previous stroke (%)</b>                       | 12.7             | 14.5                                 | 9.8                                      | 0.256    |
| <b>Ischemic cardiomyopathy (%)</b>               | 64.4             | 63                                   | 66.7                                     | 0.539    |
| <b>Previous PCI (%)</b>                          | 44.5             | 41.3                                 | 50                                       | 0.160    |
| <b>Previous CABG (%)</b>                         | 18.2             | 17.3                                 | 19.6                                     | 0.639    |
| <b>Previous valvular intervention (%)</b>        | 9.1              | 10.4                                 | 6.9                                      | 0.315    |
| <b>NYHA Class (%)</b>                            |                  |                                      |                                          | 0.883    |
| <b>I</b>                                         | 0                | 0                                    | 0                                        |          |
| <b>II</b>                                        | 17.1             | 18                                   | 15.7                                     |          |
| <b>III</b>                                       | 58.8             | 58.1                                 | 59.8                                     |          |
| <b>IV</b>                                        | 24.1             | 23.8                                 | 24.5                                     |          |
| <b>Previous Year Heart Failure Admission (%)</b> | 78.6             | 82.1                                 | 72.6                                     | 0.070    |
| <b>ProBNP</b>                                    | 5017 (2906-9210) | 5279 (2810-7990)                     | 5000 (3931-11150)                        | 0.308    |
| <b>STS score</b>                                 | 3.6 (1.9-6.2)    | 3.6 (1.8-6.2)                        | 3.7 (2.1-6.3)                            | 0.375    |
| <b>EuroScore II</b>                              | 5.4 (2.9-9.3)    | 5.4 (2.8-9)                          | 5.4 (3-9.8)                              | 0.855    |

PCI: percutaneous cardiac intervention; CABG: coronary artery bypass grafting; NYHA: New York Heart Association; ProBNP: pro-brain natriuretic peptide; STS: Society of Thoracic Surgeons.

Table S2

|                                                  | <b>Overall</b>   | <b>LVGLS<br/>available<br/>n=172</b> | <b>LVGLS non<br/>available<br/>n=103</b> | <b>p</b>         |
|--------------------------------------------------|------------------|--------------------------------------|------------------------------------------|------------------|
| <b>LVEF (%)</b>                                  | 31.6 (26.3-36.0) | 33 (27-36.2)                         | 30 (26-36)                               | 0.088            |
| <b>EDLVV (ml)</b>                                | 180 (140-224)    | 186 (143-237)                        | 161 (131-207)                            | 0.162            |
| <b>ESLVV (ml)</b>                                | 110 (85-155)     | 118 (90-158)                         | 104 (78-155)                             | 0.162            |
| <b>EDLVD (mm)</b>                                | 62 (58-69)       | 63 (58-69)                           | 62 (56-69)                               | 0.493            |
| <b>ESLVD (mm)</b>                                | 48 (42-57)       | 45 (39-57)                           | 48 (44.5-57)                             | 0.152            |
| <b>MR Grade (%)</b>                              |                  |                                      |                                          | 0.586            |
| <b>≤2</b>                                        | 0                | 0                                    | 0                                        |                  |
| <b>3</b>                                         | 18.3             | 17.3                                 | 20                                       |                  |
| <b>4</b>                                         | 81.7             | 82.7                                 | 80                                       |                  |
| <b>MR mechanism (%)</b>                          |                  |                                      |                                          | <b>&lt;0.000</b> |
| <b>Primary</b>                                   | 4.4              | 4.1                                  | 4.9                                      |                  |
| <b>Secondary</b>                                 | 61.5             | 24.3                                 | 51                                       |                  |
| <b>Mixed</b>                                     | 34.2             | 71.7                                 | 44.1                                     |                  |
| <b>Mitral annulus calcification (%)</b>          | 26.6             | 26.2                                 | 28.4                                     | 0.816            |
| <b>Subvalvular apparatus calcification (%)</b>   | 7                | 8.2                                  | 5.1                                      | 0.331            |
| <b>Excentric jet (%)</b>                         | 20.5             | 17.4                                 | 25.7                                     | 0.105            |
| <b>Multiple jets (%)</b>                         | 8.9              | 10.7                                 | 6                                        | 0.184            |
| <b>EROA (cm)</b>                                 | 0.4 (0.3-0.6)    | 0.4 (0.3-0.5)                        | 0.5 (0.3-0.6)                            | 0.060            |
| <b>Mitral Mean Gradient (mmHg)</b>               | 1.5 (1-2)        | 1.3 (1-2)                            | 1.9 (1-2.1)                              | 0.060            |
| <b>Mitral Valvular Area (cm2)</b>                | 5.5 (4.5-6.7)    | 5.5 (4.5-6.7)                        | 5.5. (4.5-6.7)                           | 0.859            |
| <b>Sistolic Pulmonary Artery Pressure (mmHg)</b> | 48 (35-58)       | 50 (39-57)                           | 45 (34-60)                               | 0.667            |
| <b>LVGLS (%)</b>                                 | 8.8+/-2.6        |                                      |                                          | N/A              |
| <b>Tricuspid regurgitation grade (%)</b>         |                  |                                      |                                          | 0.091            |
| <b>0-1</b>                                       | 51.9             | 52                                   | 51.7                                     |                  |
| <b>2</b>                                         | 18.8             | 15.7                                 | 29                                       |                  |

|                                                   |            |            |           |       |
|---------------------------------------------------|------------|------------|-----------|-------|
| <b>3</b>                                          | 17.3       | 19.6       | 9.7       |       |
| <b>4</b>                                          | 12         | 12.8       | 9.7       |       |
| <b>TAPSE (mm)</b>                                 | 17±4       | 17±4       | 16.9±4    | 0.839 |
| <b>Right Ventricle Fractional Area Change (%)</b> | 40±13.8    | 40.2±12.5  | 39.9±17.9 | 0.954 |
| <b>EDRVD (mm)</b>                                 | 46.3±12.6  | 47±13.4    | 44.2±11   | 0.123 |
| <b>LAV (ml)</b>                                   | 103.9±52.7 | 106.7±55.4 | 95.1±45.9 | 0.155 |

LVEF: left ventricular ejection fraction; EDLVV: end-diastolic left ventricular volume; ESLVV: end-systolic left ventricular volume; EDLVD: end-diastolic left ventricular diameter; ESLVD: end-systolic left ventricular volume; EROA: effective regurgitant orifice area; LVGLS: left ventricular global longitudinal strain; EDRVD: End-diastolic right ventricular diameter; LAV: left atrium volume.

Figure S1. Example of analysis of left ventricular global longitudinal strain being measured

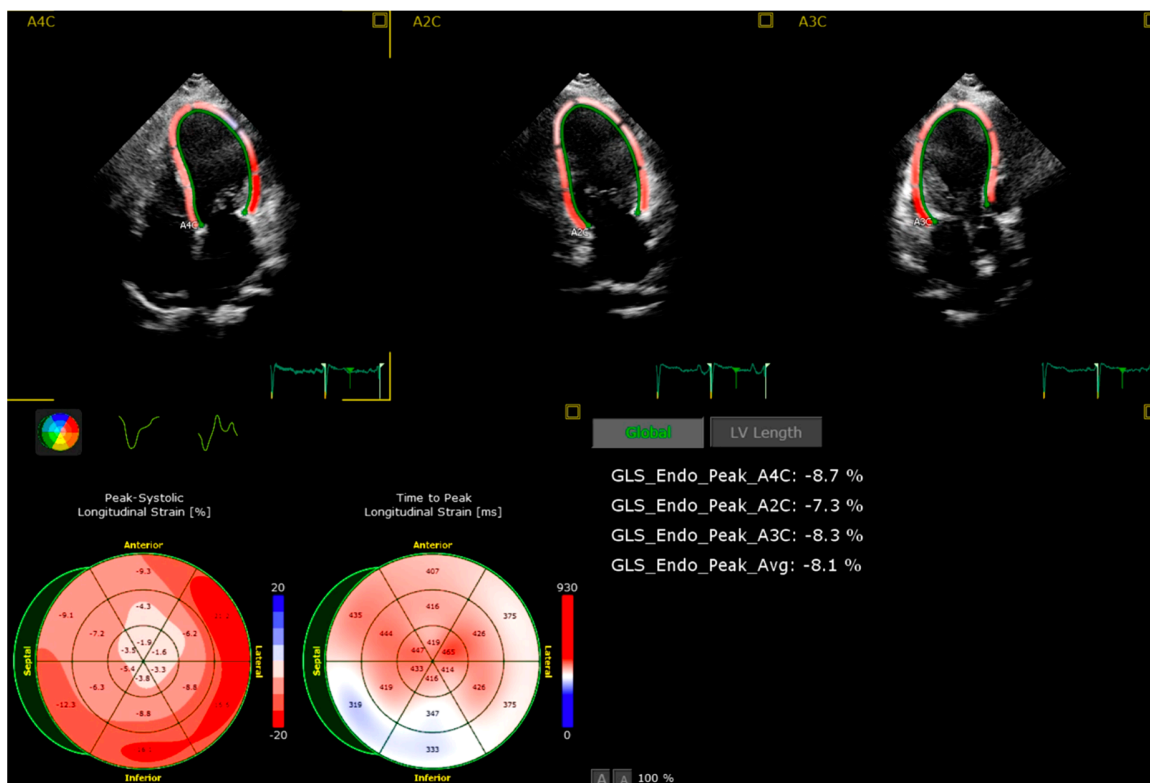

Supplement: s1 [file s1]
